# Supplementary material for: Forest expansion dominates China’s land carbon sink since 1980
Source: Springer Nature journal article supplement (doi:10.1038/s41467-022-32961-2), 2022-09-13
Supplement: 41467_2022_32961_MOESM2_ESM.pdf [file 41467_2022_32961_MOESM2_ESM.pdf]

## **Description of Additional Supplementary Files**

File Name: Supplementary Data 1

Description: The reconstructed LUCC data used in this study.
